# Supplementary material for: AI-driven system for non-contact continuous nocturnal blood pressure monitoring using fiber optic ballistocardiography
Source: PubMed Central journal article supplement — Commun Eng. 2024 Dec 19;3:183. doi: 10.1038/s44172-024-00326-w (PMC11659553; doi:10.1038/s44172-024-00326-w), 2024-12-19
Supplement: 44172_2024_326_MOESM2_ESM.pdf [file 44172_2024_326_MOESM2_ESM.pdf]

# Description of Additional Supplementary Files

**File name:** Supplementary Movie 1

**Description:** Demonstration
