# Supplementary material for: AI-driven system for non-contact continuous nocturnal blood pressure monitoring using fiber optic ballistocardiography
Source: PubMed Central journal article supplement — Commun Eng. 2024 Dec 19;3:183. doi: 10.1038/s44172-024-00326-w (PMC11659553; doi:10.1038/s44172-024-00326-w), 2024-12-19
Supplement: 44172_2024_326_MOESM4_ESM.pdf [file 44172_2024_326_MOESM4_ESM.pdf]

## Reporting Summary

Nature Portfolio wishes to improve the reproducibility of the work that we publish. This form provides structure for consistency and transparency in reporting. For further information on Nature Portfolio policies, see our [Editorial Policies](#) and the [Editorial Policy Checklist](#).

### Statistics

For all statistical analyses, confirm that the following items are present in the figure legend, table legend, main text, or Methods section.

n/a Confirmed

- The exact sample size ( $n$ ) for each experimental group/condition, given as a discrete number and unit of measurement
- A statement on whether measurements were taken from distinct samples or whether the same sample was measured repeatedly
- The statistical test(s) used AND whether they are one- or two-sided  
*Only common tests should be described solely by name; describe more complex techniques in the Methods section.*
- A description of all covariates tested
- A description of any assumptions or corrections, such as tests of normality and adjustment for multiple comparisons
- A full description of the statistical parameters including central tendency (e.g. means) or other basic estimates (e.g. regression coefficient) AND variation (e.g. standard deviation) or associated estimates of uncertainty (e.g. confidence intervals)
- For null hypothesis testing, the test statistic (e.g.  $F$ ,  $t$ ,  $r$ ) with confidence intervals, effect sizes, degrees of freedom and  $P$  value noted  
*Give  $P$  values as exact values whenever suitable.*
- For Bayesian analysis, information on the choice of priors and Markov chain Monte Carlo settings
- For hierarchical and complex designs, identification of the appropriate level for tests and full reporting of outcomes
- Estimates of effect sizes (e.g. Cohen's  $d$ , Pearson's  $r$ ), indicating how they were calculated

*Our web collection on [statistics for biologists](#) contains articles on many of the points above.*

### Software and code

Policy information about [availability of computer code](#)

Data collection

The public datasets used in this study can be accessed via <https://iee-dataport.org/open-access/bed-based-ballistocardiography-dataset>. We use customized sensor mat for BCG data collection, and use Caretaker Device as the ground-truth device.

Data analysis

Analysis of sensor data was performed in Python 3.8 using openly available packages including NumPy (1.22.2), SciPy (1.7.3), Pandas (1.2.4), neurokit2 (0.2.0), Scikit-learn (1.0.2) and SHAP (0.43.0). Visualization was created using MATLAB R2020a.

For manuscripts utilizing custom algorithms or software that are central to the research but not yet described in published literature, software must be made available to editors and reviewers. We strongly encourage code deposition in a community repository (e.g. GitHub). See the Nature Portfolio [guidelines for submitting code & software](#) for further information.

### Data

Policy information about [availability of data](#)

All manuscripts must include a [data availability statement](#). This statement should provide the following information, where applicable:

- Accession codes, unique identifiers, or web links for publicly available datasets
- A description of any restrictions on data availability
- For clinical datasets or third party data, please ensure that the statement adheres to our [policy](#)

The main data supporting the results in this study are available within the paper and its Supplementary Information. The public datasets used in this study can

## Human research participants

Policy information about [studies involving human research participants and Sex and Gender in Research](#).

|                             |                                                                                                                                                                                                                                                                                                                                                                                                                                                         |
|-----------------------------|---------------------------------------------------------------------------------------------------------------------------------------------------------------------------------------------------------------------------------------------------------------------------------------------------------------------------------------------------------------------------------------------------------------------------------------------------------|
| Reporting on sex and gender | No sex- and gender- based analyse have been performed.                                                                                                                                                                                                                                                                                                                                                                                                  |
| Population characteristics  | Initially, the study included 88 subjects in the daytime dataset and 40 subjects in the nocturnal dataset. Three patients were excluded from the daytime dataset and seven from the nocturnal dataset due to storage errors, missing channel data, and device disconnection. The inclusion and exclusion criteria are listed in Supplementary Note. A comprehensive demographic breakdown of the included subjects is presented in Supplementary Table. |
| Recruitment                 | The patients were recruited from Guangdong Second Provincial General Hospital                                                                                                                                                                                                                                                                                                                                                                           |
| Ethics oversight            | The study protocol was reviewed and approved by the institutional review board of the Guangdong Second Provincial General Hospital (protocol no. 2023-KY-KZ-082-01). All subjects reviewed and signed the printed consent forms before participating in our study.                                                                                                                                                                                      |

Note that full information on the approval of the study protocol must also be provided in the manuscript.

## Field-specific reporting

Please select the one below that is the best fit for your research. If you are not sure, read the appropriate sections before making your selection.

Life sciences  Behavioural & social sciences  Ecological, evolutionary & environmental sciences

For a reference copy of the document with all sections, see [nature.com/documents/nr-reporting-summary-flat.pdf](https://nature.com/documents/nr-reporting-summary-flat.pdf)

## Life sciences study design

All studies must disclose on these points even when the disclosure is negative.

|                 |                                                                                                                                                                   |
|-----------------|-------------------------------------------------------------------------------------------------------------------------------------------------------------------|
| Sample size     | Initially, the study included 88 subjects in the daytime dataset and 40 subjects in the nocturnal dataset. The demographics is provided in Supplementary Table 1. |
| Data exclusions | Three patients were excluded from the daytime dataset and seven from the nocturnal dataset due to storage errors, missing channel data, and device disconnection. |
| Replication     | We apply leave-one-subject-out validation for each subject to get the average results.                                                                            |
| Randomization   | Subjects are divided into normotensive and hypertension groups. The samples is randomly divided as training, validation, and testing set.                         |
| Blinding        | No bias during the data analysis.                                                                                                                                 |

## Reporting for specific materials, systems and methods

We require information from authors about some types of materials, experimental systems and methods used in many studies. Here, indicate whether each material, system or method listed is relevant to your study. If you are not sure if a list item applies to your research, read the appropriate section before selecting a response.

### Materials & experimental systems

| n/a                                 | Involved in the study                                  |
|-------------------------------------|--------------------------------------------------------|
| <input checked="" type="checkbox"/> | <input type="checkbox"/> Antibodies                    |
| <input checked="" type="checkbox"/> | <input type="checkbox"/> Eukaryotic cell lines         |
| <input checked="" type="checkbox"/> | <input type="checkbox"/> Palaeontology and archaeology |
| <input checked="" type="checkbox"/> | <input type="checkbox"/> Animals and other organisms   |
| <input type="checkbox"/>            | <input checked="" type="checkbox"/> Clinical data      |
| <input checked="" type="checkbox"/> | <input type="checkbox"/> Dual use research of concern  |

### Methods

| n/a                                 | Involved in the study                           |
|-------------------------------------|-------------------------------------------------|
| <input checked="" type="checkbox"/> | <input type="checkbox"/> ChIP-seq               |
| <input checked="" type="checkbox"/> | <input type="checkbox"/> Flow cytometry         |
| <input checked="" type="checkbox"/> | <input type="checkbox"/> MRI-based neuroimaging |

## Clinical data

---

Policy information about [clinical studies](#)

All manuscripts should comply with the ICMJE [guidelines for publication of clinical research](#) and a completed [CONSORT checklist](#) must be included with all submissions.

Clinical trial registration

Study protocol

Data collection

Outcomes
